# Supplementary material for: Climate uncertainty in flood protection planning
Source: Copernicus journal article supplement (doi:10.5194/hess-2017-576), 2017-11-01
Supplement: Supplementary file 1 [file hess-2017-576-supplement.pdf]

# Climate uncertainty in flood protection planning

B. Dittes<sup>1</sup>, O. Špačková<sup>1</sup>, L. Schoppa<sup>1</sup> and D. Straub<sup>1</sup>

<sup>1</sup>Engineering Risk Analysis Group, Technische Universität München, Arcisstr. 21, 80333 München, Germany

5 *Correspondence to:* Beatrice Dittes (beatrice.dittes@tum.de)

## Supplement

### Supplement A Historic annual maximum discharge at gauge Rosenheim (Mangfall)

Annual maximum discharges for the Mangfall gauge at Rosenheim (gauge nr. 18900200) as used in the  
10 case study.

| Year | Maximum discharge [m <sup>3</sup> s <sup>-1</sup> ] |
|------|-----------------------------------------------------|
| 1970 | 211                                                 |
| 1971 | 69.4                                                |
| 1972 | 124                                                 |
| 1973 | 134                                                 |
| 1974 | 141                                                 |
| 1975 | 132                                                 |
| 1976 | 163                                                 |
| 1977 | 125                                                 |
| 1978 | 124                                                 |
| 1979 | 333                                                 |
| 1980 | 95.3                                                |
| 1981 | 275                                                 |
| 1982 | 141                                                 |
| 1983 | 126                                                 |
| 1984 | 65.4                                                |
| 1985 | 241                                                 |
| 1986 | 82.9                                                |
| 1987 | 123                                                 |
| 1988 | 138                                                 |

|      |      |
|------|------|
| 1989 | 68.1 |
| 1990 | 146  |
| 1991 | 137  |
| 1992 | 132  |
| 1993 | 124  |
| 1994 | 122  |
| 1995 | 224  |
| 1996 | 116  |
| 1997 | 170  |
| 1998 | 95   |
| 1999 | 337  |
| 2000 | 149  |
| 2001 | 128  |
| 2002 | 192  |
| 2003 | 58.4 |
| 2004 | 89.3 |
| 2005 | 254  |
| 2006 | 95.4 |
| 2007 | 161  |
| 2008 | 106  |

---

### Supplement B Projections of annual maximum discharge at gauge Rosenheim (Mangfall)

Annual maximum discharges [ $\text{m}^3\text{s}^{-1}$ ] projected at Rosenheim (**p**) during the planning horizon of 90 years, based on WaSiM v8.06.02, Inn, daily, 1km<sup>2</sup>.

| Year | CLM1 | CLM2 | CCLM | REMO1 | REMO2 | REMO3 | RACMO | HadRM | HadGM | BCM |
|------|------|------|------|-------|-------|-------|-------|-------|-------|-----|
| 2009 | 148  | 117  | 313  | 165   | 83.9  | 237   | 393   | 205   | 216   | 164 |
| 2010 | 107  | 166  | 258  | 154   | 113   | 241   | 225   | 140   | 264   | 277 |
| 2011 | 140  | 138  | 236  | 123   | 166   | 148   | 127   | 126   | 164   | 160 |
| 2012 | 269  | 168  | 246  | 194   | 136   | 258   | 110   | 212   | 268   | 352 |
| 2013 | 113  | 171  | 196  | 195   | 170   | 145   | 146   | 196   | 200   | 249 |
| 2014 | 131  | 102  | 252  | 134   | 190   | 105   | 188   | 253   | 194   | 214 |
| 2015 | 216  | 238  | 251  | 174   | 208   | 111   | 135   | 239   | 284   | 171 |
| 2016 | 181  | 244  | 128  | 241   | 264   | 331   | 659   | 98.5  | 117   | 129 |
| 2017 | 134  | 274  | 178  | 139   | 306   | 128   | 166   | 291   | 275   | 131 |
| 2018 | 457  | 294  | 370  | 609   | 233   | 183   | 140   | 245   | 132   | 168 |
| 2019 | 219  | 116  | 202  | 282   | 133   | 156   | 181   | 138   | 145   | 228 |

|      |      |      |      |      |      |      |      |      |      |      |
|------|------|------|------|------|------|------|------|------|------|------|
| 2020 | 185  | 206  | 336  | 232  | 178  | 212  | 367  | 139  | 177  | 161  |
| 2021 | 107  | 163  | 176  | 91   | 221  | 171  | 90.8 | 172  | 159  | 309  |
| 2022 | 140  | 431  | 189  | 322  | 226  | 104  | 155  | 518  | 193  | 180  |
| 2023 | 418  | 270  | 202  | 225  | 147  | 227  | 332  | 169  | 146  | 144  |
| 2024 | 216  | 126  | 283  | 95   | 173  | 158  | 124  | 215  | 168  | 218  |
| 2025 | 131  | 130  | 165  | 184  | 116  | 225  | 132  | 141  | 215  | 246  |
| 2026 | 149  | 183  | 403  | 135  | 125  | 328  | 156  | 116  | 149  | 195  |
| 2027 | 152  | 201  | 452  | 174  | 250  | 158  | 170  | 157  | 335  | 189  |
| 2028 | 251  | 371  | 146  | 197  | 425  | 138  | 182  | 390  | 552  | 371  |
| 2029 | 181  | 238  | 369  | 153  | 205  | 424  | 230  | 175  | 323  | 169  |
| 2030 | 552  | 225  | 188  | 238  | 161  | 102  | 140  | 168  | 397  | 217  |
| 2031 | 175  | 370  | 399  | 175  | 104  | 101  | 125  | 159  | 381  | 90.1 |
| 2032 | 157  | 533  | 181  | 105  | 250  | 131  | 179  | 138  | 424  | 224  |
| 2033 | 135  | 213  | 67.2 | 319  | 183  | 193  | 168  | 133  | 185  | 166  |
| 2034 | 277  | 110  | 207  | 123  | 234  | 291  | 477  | 100  | 417  | 207  |
| 2035 | 253  | 118  | 333  | 134  | 147  | 165  | 310  | 281  | 142  | 214  |
| 2036 | 284  | 156  | 249  | 159  | 172  | 108  | 58   | 191  | 282  | 178  |
| 2037 | 185  | 155  | 92   | 94.8 | 140  | 156  | 125  | 157  | 121  | 165  |
| 2038 | 270  | 123  | 197  | 241  | 207  | 493  | 137  | 126  | 253  | 343  |
| 2039 | 196  | 237  | 193  | 173  | 180  | 130  | 142  | 134  | 225  | 175  |
| 2040 | 238  | 163  | 211  | 123  | 232  | 332  | 215  | 199  | 210  | 141  |
| 2041 | 166  | 116  | 194  | 145  | 140  | 240  | 171  | 229  | 192  | 308  |
| 2042 | 158  | 139  | 144  | 206  | 180  | 102  | 165  | 239  | 149  | 154  |
| 2043 | 365  | 139  | 90.7 | 377  | 160  | 110  | 78.2 | 182  | 76.9 | 107  |
| 2044 | 216  | 321  | 280  | 145  | 126  | 110  | 220  | 162  | 179  | 180  |
| 2045 | 188  | 186  | 301  | 196  | 165  | 150  | 118  | 188  | 137  | 315  |
| 2046 | 255  | 591  | 219  | 158  | 170  | 130  | 297  | 425  | 449  | 195  |
| 2047 | 141  | 191  | 331  | 146  | 291  | 229  | 192  | 160  | 328  | 219  |
| 2048 | 95.5 | 332  | 164  | 96.3 | 265  | 69.9 | 92.9 | 182  | 298  | 237  |
| 2049 | 194  | 176  | 226  | 199  | 214  | 170  | 133  | 151  | 124  | 235  |
| 2050 | 388  | 412  | 240  | 154  | 296  | 118  | 190  | 181  | 125  | 189  |
| 2051 | 103  | 92.3 | 140  | 112  | 154  | 209  | 212  | 276  | 237  | 239  |
| 2052 | 367  | 128  | 153  | 423  | 58.8 | 85.2 | 271  | 141  | 181  | 163  |
| 2053 | 196  | 263  | 303  | 157  | 91.1 | 173  | 207  | 64.6 | 135  | 137  |
| 2054 | 343  | 112  | 202  | 155  | 122  | 347  | 169  | 167  | 263  | 146  |
| 2055 | 99.4 | 159  | 142  | 172  | 266  | 160  | 114  | 241  | 229  | 101  |
| 2056 | 156  | 111  | 261  | 337  | 147  | 138  | 166  | 90.5 | 131  | 198  |
| 2057 | 152  | 278  | 123  | 128  | 175  | 194  | 269  | 138  | 214  | 148  |
| 2058 | 132  | 208  | 249  | 142  | 180  | 201  | 180  | 472  | 220  | 142  |

|      |      |      |      |      |      |      |      |      |      |      |
|------|------|------|------|------|------|------|------|------|------|------|
| 2059 | 157  | 287  | 178  | 208  | 316  | 271  | 288  | 190  | 163  | 235  |
| 2060 | 152  | 148  | 124  | 81.2 | 171  | 208  | 158  | 117  | 346  | 311  |
| 2061 | 381  | 299  | 290  | 72.1 | 245  | 186  | 79.1 | 115  | 305  | 161  |
| 2062 | 134  | 176  | 170  | 89.5 | 220  | 300  | 190  | 223  | 187  | 124  |
| 2063 | 160  | 150  | 143  | 217  | 135  | 281  | 401  | 119  | 236  | 325  |
| 2064 | 156  | 186  | 342  | 94.2 | 208  | 112  | 145  | 158  | 90.6 | 192  |
| 2065 | 353  | 104  | 213  | 170  | 273  | 142  | 202  | 189  | 170  | 175  |
| 2066 | 210  | 65.4 | 268  | 110  | 238  | 130  | 119  | 171  | 170  | 195  |
| 2067 | 628  | 145  | 91.5 | 195  | 168  | 162  | 401  | 147  | 141  | 265  |
| 2068 | 202  | 208  | 102  | 106  | 357  | 175  | 339  | 210  | 238  | 150  |
| 2069 | 285  | 116  | 309  | 146  | 59.5 | 154  | 321  | 186  | 254  | 249  |
| 2070 | 94.9 | 208  | 278  | 64.2 | 105  | 169  | 123  | 284  | 156  | 174  |
| 2071 | 278  | 132  | 350  | 188  | 72   | 217  | 154  | 248  | 239  | 171  |
| 2072 | 204  | 119  | 151  | 95.3 | 196  | 121  | 206  | 175  | 222  | 243  |
| 2073 | 122  | 157  | 216  | 184  | 201  | 175  | 227  | 86.1 | 332  | 259  |
| 2074 | 284  | 218  | 207  | 200  | 126  | 159  | 235  | 177  | 172  | 138  |
| 2075 | 148  | 78.6 | 96.1 | 133  | 97.9 | 118  | 281  | 184  | 170  | 145  |
| 2076 | 247  | 277  | 238  | 123  | 140  | 123  | 305  | 243  | 206  | 169  |
| 2077 | 116  | 216  | 131  | 101  | 229  | 231  | 217  | 121  | 192  | 107  |
| 2078 | 130  | 192  | 325  | 153  | 183  | 203  | 225  | 181  | 275  | 158  |
| 2079 | 155  | 101  | 161  | 232  | 152  | 193  | 95.5 | 127  | 170  | 141  |
| 2080 | 319  | 91.4 | 97.7 | 155  | 120  | 94.4 | 187  | 175  | 172  | 241  |
| 2081 | 257  | 194  | 270  | 253  | 158  | 190  | 206  | 183  | 262  | 192  |
| 2082 | 243  | 225  | 191  | 230  | 123  | 123  | 191  | 121  | 124  | 230  |
| 2083 | 110  | 106  | 128  | 87.6 | 160  | 192  | 171  | 293  | 295  | 213  |
| 2084 | 180  | 183  | 200  | 217  | 276  | 305  | 261  | 197  | 114  | 249  |
| 2085 | 92.3 | 223  | 194  | 80.4 | 134  | 216  | 308  | 288  | 143  | 190  |
| 2086 | 188  | 299  | 148  | 89.1 | 121  | 130  | 301  | 304  | 317  | 431  |
| 2087 | 208  | 189  | 309  | 111  | 106  | 147  | 342  | 82.9 | 250  | 179  |
| 2088 | 135  | 151  | 277  | 194  | 145  | 93.2 | 137  | 85.4 | 149  | 257  |
| 2089 | 213  | 135  | 119  | 186  | 122  | 90.7 | 409  | 121  | 141  | 89.2 |
| 2090 | 143  | 290  | 219  | 248  | 130  | 174  | 195  | 159  | 229  | 177  |
| 2091 | 57.6 | 188  | 295  | 80.6 | 152  | 132  | 267  | 181  | 253  | 166  |
| 2092 | 562  | 240  | 179  | 185  | 168  | 346  | 830  | 125  | 150  | 245  |
| 2093 | 154  | 227  | 355  | 94.1 | 187  | 148  | 175  | 178  | 199  | 166  |
| 2094 | 150  | 113  | 106  | 85   | 128  | 82   | 148  | 111  | 566  | 243  |
| 2095 | 185  | 187  | 340  | 111  | 153  | 145  | 163  | 158  | 143  | 174  |
| 2096 | 244  | 119  | 208  | 115  | 91.1 | 298  | 211  | 165  | 158  | 79.2 |
| 2097 | 306  | 133  | 74.3 | 267  | 121  | 221  | 170  | 610  | 187  | 200  |

**Supplement C Estimate of variance shares in projections of annual maximum discharge**

Estimated variance share of the ‘hidden’ uncertainty components,  $\eta_t^{(hidden)}$ , and the internal variability,  $\eta_t^{(internal)}$ , in annual maximum discharge at gauge Rosenheim, Mangfall. The hidden uncertainty here  
 5 comprises the forcing, downscaling, hydrological model and interaction components.

| Projection horizon [years] | Hidden variance share [%] | Internal variability share [%] |
|----------------------------|---------------------------|--------------------------------|
| 1                          | 0                         | 100                            |
| 2                          | 0                         | 100                            |
| 3                          | 0                         | 99                             |
| 4                          | 1                         | 99                             |
| 5                          | 1                         | 99                             |
| 6                          | 1                         | 98                             |
| 7                          | 1                         | 98                             |
| 8                          | 1                         | 97                             |
| 9                          | 2                         | 97                             |
| 10                         | 2                         | 96                             |
| 11                         | 2                         | 96                             |
| 12                         | 2                         | 95                             |
| 13                         | 3                         | 95                             |
| 14                         | 3                         | 94                             |
| 15                         | 3                         | 93                             |
| 16                         | 4                         | 93                             |
| 17                         | 4                         | 92                             |
| 18                         | 4                         | 91                             |
| 19                         | 5                         | 91                             |
| 20                         | 5                         | 90                             |
| 21                         | 6                         | 89                             |
| 22                         | 6                         | 88                             |
| 23                         | 6                         | 87                             |
| 24                         | 7                         | 86                             |
| 25                         | 7                         | 86                             |
| 26                         | 8                         | 85                             |
| 27                         | 8                         | 84                             |
| 28                         | 9                         | 83                             |

|    |    |    |
|----|----|----|
| 29 | 9  | 82 |
| 30 | 10 | 81 |
| 31 | 10 | 80 |
| 32 | 11 | 79 |
| 33 | 11 | 78 |
| 34 | 12 | 77 |
| 35 | 12 | 76 |
| 36 | 13 | 75 |
| 37 | 13 | 74 |
| 38 | 14 | 73 |
| 39 | 14 | 72 |
| 40 | 15 | 70 |
| 41 | 16 | 69 |
| 42 | 16 | 68 |
| 43 | 17 | 67 |
| 44 | 17 | 66 |
| 45 | 18 | 65 |
| 46 | 19 | 64 |
| 47 | 19 | 62 |
| 48 | 20 | 61 |
| 49 | 20 | 60 |
| 50 | 21 | 59 |
| 51 | 22 | 58 |
| 52 | 22 | 57 |
| 53 | 23 | 55 |
| 54 | 24 | 54 |
| 55 | 24 | 53 |
| 56 | 25 | 52 |
| 57 | 26 | 51 |
| 58 | 26 | 50 |
| 59 | 27 | 48 |
| 60 | 28 | 47 |
| 61 | 28 | 46 |
| 62 | 29 | 45 |
| 63 | 30 | 44 |
| 64 | 30 | 42 |
| 65 | 31 | 41 |
| 66 | 32 | 40 |
| 67 | 32 | 39 |

|    |    |    |
|----|----|----|
| 68 | 33 | 38 |
| 69 | 34 | 37 |
| 70 | 34 | 36 |
| 71 | 35 | 34 |
| 72 | 35 | 33 |
| 73 | 36 | 32 |
| 74 | 37 | 31 |
| 75 | 37 | 30 |
| 76 | 38 | 29 |
| 77 | 39 | 28 |
| 78 | 39 | 27 |
| 79 | 40 | 26 |
| 80 | 41 | 25 |
| 81 | 41 | 24 |
| 82 | 42 | 23 |
| 83 | 43 | 22 |
| 84 | 43 | 21 |
| 85 | 44 | 20 |
| 86 | 44 | 19 |
| 87 | 45 | 18 |
| 88 | 46 | 17 |
| 89 | 46 | 17 |
| 90 | 47 | 16 |

---
